# Supplementary material for: Sacubitril/Valsartan Improves Cardiac Function and Decreases Myocardial Fibrosis Via Downregulation of Exosomal miR‐181a in a Rodent Chronic Myocardial Infarction Model
Source: PubMed Central journal article supplement — J Am Heart Assoc. 2020 Jun 15;9(13):e015640. doi: 10.1161/JAHA.119.015640 (PMC7670523; doi:10.1161/jaha.119.015640), 2020-06-15
Supplement: JAH3-9-e015640-s001.pdf [file JAH3-9-e015640-s001.pdf]

# **SUPPLEMENTAL MATERIAL**

Figure S1. The effect of the exosomes on cardiac function.

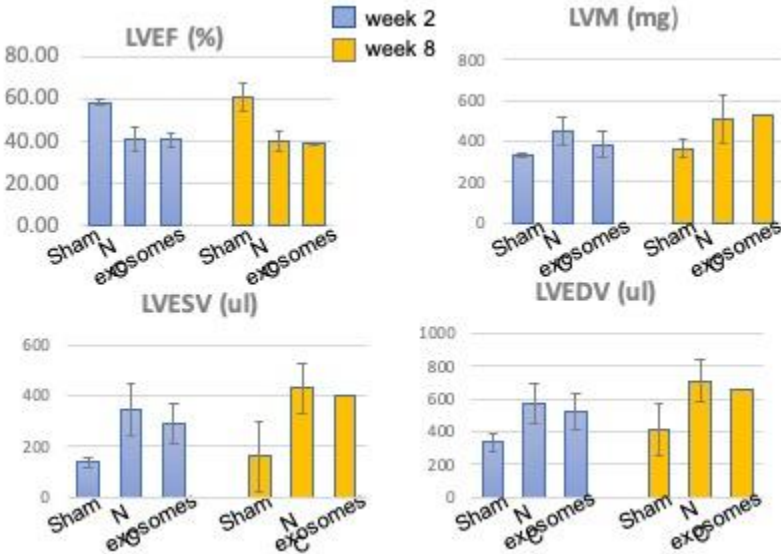

Left ventricular ejection fraction (LVEF), left ventricular end-diastolic volume (LVEDV), left ventricular end systolic volume (LVESV), left ventricular (LV) mass at weeks 2 and 8.

**Figure S2. Production of the exosomes derived from rat plasma.**

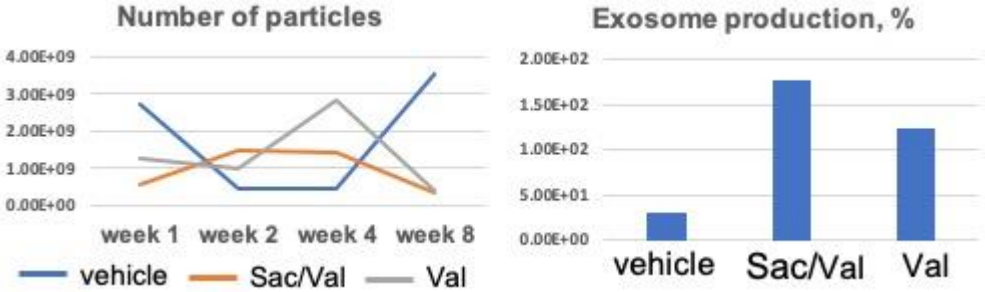

(A)The dynamic of changes in exosome production, (B) Production of the exosomes (%) when normalized to the control group.
